# Supplementary material
Source: PubMed Central journal article supplement (PMC9389478)
Supplement: 41390_2022_2265_MOESM1_ESM.pdf [file 41390_2022_2265_MOESM1_ESM.pdf]

**OPTISURF QI PROJECT DATA COLLECTION SHEET**

**PLEASE FILL OUT THIS SHEET AFTER EACH LISA PROCEDURE**

**(To be completed by respiratory therapist soon after completing the procedure)**

**GA:**

**LISA PROCEDURE DETAILS:** *FIRST DOSE / SECOND DOSE / THIRD DOSE*

START DATE & TIME <sup>1</sup>:

END DATE & TIME <sup>2</sup>:

NUMBER OF CATHETER INSERTION ATTEMPTS<sup>3</sup>:

PROVIDER WHO INSERTED CATHETER (select one):

*ATTENDING / FELLOW / NNP / RESIDENTS*

*Successful attempt by: ATTENDING / FELLOW / NNP / RESIDENTS*

CPAP LEVEL PRIOR TO LISA:

FiO<sub>2</sub> PRIOR TO LISA:

**DESATURATION (circle one response):** YES OR NO

DURATION<sup>4</sup>:

LOWEST SpO<sub>2</sub>:

HIGHEST SpO<sub>2</sub>:

**BRADYCARDIA <sup>5</sup> (circle one response):** YES OR NO

DURATION:

LOWEST HR:

HIGHEST HR:

SELF RESOLVING: YES OR NO

**TACTILE STIMULATION: YES/NO**

**POSITIVE PRESSURE VENTILATION (circle one response) :** YES OR NO

DURATION OF PPV (seconds):

NEEDING INTUBATION IMMEDIATELY AFTER LISA? (circle one response): YES OR NO

**SURFACTANT REFLUX (surfactant amount aspirated from stomach in ml):**

**ADDITIONAL COMMENTS:**

ONCE COMPLETED PLEASE PLACE IN LISA BINDER

Description of recordings (see superscripts)

1. START DATE & TIME: Time of first direct laryngoscope blade insertion
2. END DATE & TIME: Time of removing the catheter after surfactant administration
3. CATHETER INSERTION ATTEMPT: any direct laryngoscope blade insertion
4. DURATION OF DESATURATION ( $SpO_2 < 80$ ): Record the total duration of desaturation during LISA (combine all attempts)
5. DURATION OF BRADYCARDIA (HR  $< 100$ ): Record the duration of bradycardia during LISA (combine all attempts)
